# Supplementary material for: Role of graphene quantum dots with discrete band gaps on SnO2 nanodomes for NO2 gas sensors with an ultralow detection limit
Source: Royal Society of Chemistry journal article supplement (doi:10.1039/d2na00925k), 2023-01-01
Supplement: d2na00925k1.pdf [file d2na00925k1.pdf]

## Supplementary Information

### Role of graphene quantum dots with discrete band gap on SnO<sub>2</sub> nanodomes for NO<sub>2</sub> gas sensors with an ultralow detection limit

Jinho Lee,<sup>†a</sup> Minsu Park,<sup>†b</sup> Young Geun Song,<sup>c</sup> Donghwi Cho,<sup>d</sup> Kwangjae Lee,<sup>e</sup> Young-Seok Shim,<sup>\*f</sup> Seokwoo Jeon,<sup>\*a,g</sup>

<sup>a</sup> Department of Materials Science and Engineering, Korea Advanced Institute of Science and Technology (KAIST), Daejeon 34141, Republic of Korea

<sup>b</sup> Querrey Simpson Institute for Bioelectronics, Northwestern University, Evanston, IL 60208, USA

<sup>c</sup> Electronic Materials Research Center, Korea Institute of Science and Technology (KIST), Seoul 02791, Republic of Korea

<sup>d</sup> Thin Film Materials Research Center, Korea Research Institute of Chemical Technology, Yuseong, Daejeon 34114, Republic of Korea

<sup>e</sup> Department of Information Security Engineering, Sangmyung University, Cheonan 31066, Republic of Korea

<sup>f</sup> School of Energy, Materials and Chemical Engineering, Korea University of Technology and Education, Cheonan, 31253, Republic of Korea

<sup>g</sup> Department of Materials Science and Engineering, Korea University, Seoul, 02841, Republic of Korea

\* Corresponding authors.

*E-mail addresses:* [ysshim@silla.ac.kr](mailto:ysshim@silla.ac.kr) (Y.S. Shim), [jeon39@kaist.ac.kr](mailto:jeon39@kaist.ac.kr) (S. Jeon).

† These authors contributed equally to this work.

## Experimental section

### Fabrication of GQD@SnO<sub>2</sub> nanodomains

Pt/Ti (thickness of 150 nm/30 nm) interdigitated electrode patterns (IDEs) consisting of 20 electrodes with 5  $\mu\text{m}$  gap were fabricated on a SiO<sub>2</sub>/Si substrate (thickness of 300 nm/550  $\mu\text{m}$ ). Nanodome-like structures were fabricated by the soft-templating method<sup>1</sup>. The polystyrene (PS) beads (700 nm, 5.0 wt%, Spherotech, USA) were dispersed in a water:ethanol = 1:1 (v:v) solution by a centrifuge process after the concentration reached 10 wt%. The PS bead solution was pipetted onto a glass slide positioned at an angle of 45° in a Petri dish with deionized water. The Pt/Ti IDEs patterned substrate and slide glass were treated by O<sub>2</sub>-plasma treatment (CUTEMP, femtoscience) for 10 minutes before fabrication. The pipetted solution was dispersed onto the surface of deionized water and allowed to form a PS bead monolayer. The Pt/Ti IDEs patterned substrate were dipped into water and the PS bead monolayer was pulled out and dried at room temperature for 24 hours. SnO<sub>2</sub> was deposited onto the PS bead monolayer by using an electron-beam evaporator. A 150 nm thick SnO<sub>2</sub> layer was deposited at a rate of 1  $\text{\AA s}^{-1}$ . The deposited SnO<sub>2</sub> were annealed at 500 °C for 1 hour to simultaneously remove the PS templates and crystallize the SnO<sub>2</sub> nanodomains.

The GQDs were prepared from graphite intercalation compounds (GICs) through a previous method<sup>2</sup>. First, graphite and potassium sodium tartrate (KNaC<sub>4</sub>H<sub>4</sub>O<sub>6</sub>·4H<sub>2</sub>O) were vigorously mixed at a ratio of 1:15 (w:w) and then ground. The mixture was heated in a heating mantle at 250 °C for 24 hours, which led to the formation of GICs. The as-prepared GICs were immersed in DI water and sonicated to exfoliate and cut the graphite. The crude GQD solution was filtered using centrifugal microfilters (10,000 NMWL, Amicon Ultra-15), followed by dialysis using a dialysis membrane for 3 days to remove any impurities and obtain pure GQDs <5 nm in size.

The GQD solution ( $0.1 \text{ mg ml}^{-1}$ ) was repeatably drop cast (total  $100 \text{ }\mu\text{l}$ ) onto  $\text{SnO}_2$  nanodomains and allowed to dry at room temperature for 24 hours.

### **Characterization and gas response measurements**

The morphology of the GQD@ $\text{SnO}_2$  nanodomains was investigated by field-emission scanning electron microscopy (FE-SEM, SU 5000, Hitachi). The structures and fast Fourier transform (FFT) images of GQDs were investigated by transmission electron microscopy (TEM, Tecnai F20, FEI Company). The crystallinity of the sensors was measured by X-ray diffraction (XRD, Ultima IV, RIGAKU) with a  $\text{Cu-K}\alpha$  radiation source (wavelength  $1.5418 \text{ }\text{\AA}$ ). The chemical bonding and binding energies of the sensor materials were investigated by X-ray photoelectron spectroscopy (XPS) using a K-alpha system (Thermo VG Scientific) with an  $\text{Al-K}\alpha$  X-ray source. The surface charging effect was corrected with C 1s peak at  $284.7 \text{ eV}$  as a reference. The Raman spectra were collected by Senterra system (Bruker) with  $532 \text{ nm}$  laser. The samples for XPS analysis and Raman analysis were prepared by annealing for 1 hour on a hot plate at room temperature,  $50 \text{ }^\circ\text{C}$ ,  $100 \text{ }^\circ\text{C}$ , and  $150 \text{ }^\circ\text{C}$ . The oxygen content in the GQDs was estimated using Auger electron spectroscopy (AES) with a source electron beam energy of  $>10 \text{ kV}$ .

The responses of target gases were measured in a quartz tube with a 1-inch furnace (Lindberg, blue M). The operating temperature was controlled by a 1-inch furnace at room temperature,  $50 \text{ }^\circ\text{C}$ ,  $100 \text{ }^\circ\text{C}$ , and  $150 \text{ }^\circ\text{C}$  to evaluate the gas response mechanism at different operating temperatures. The gas flows were controlled to give a constant flow rate of  $1000 \text{ sccm}$  under dry condition (RH 0) using a mass-flow controller. The sensor resistance was measured using a Keithley 2401 instrument with a DC bias voltage of  $0.5 \text{ V}$ .

## Supplementary Figures

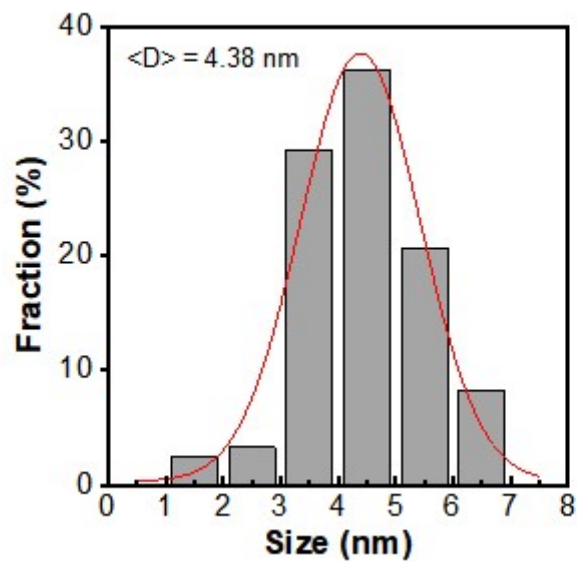

**Fig. S1.** Size distribution of pristine GQDs.  $\langle D \rangle$  indicates average size.

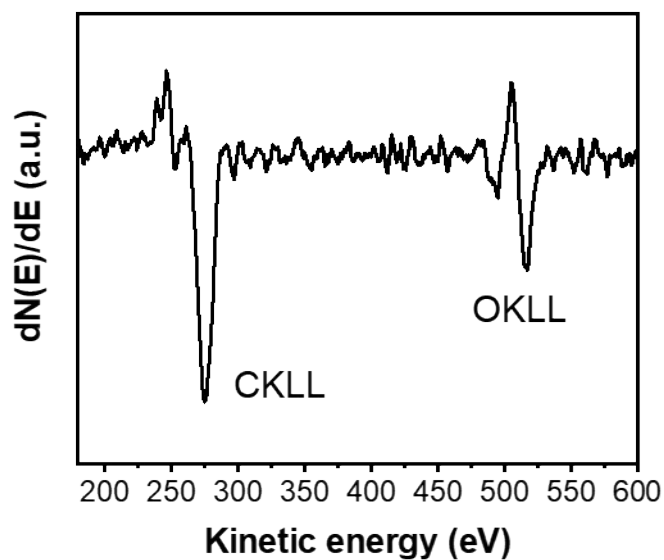

**Fig. S2.** Spectrum of magnified Auger electron spectroscopy (AES) for GQDs.

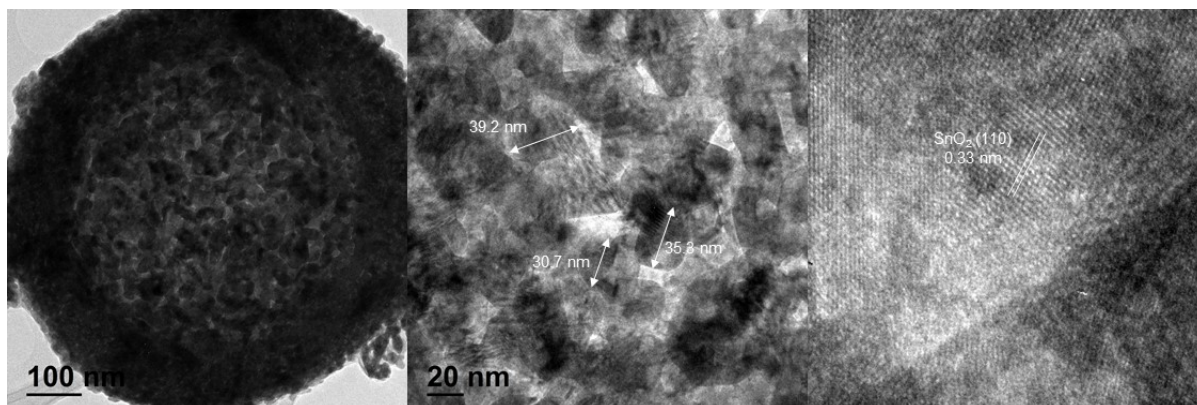

**Fig. S3.** HR-TEM image of individual SnO<sub>2</sub> nanodomains.

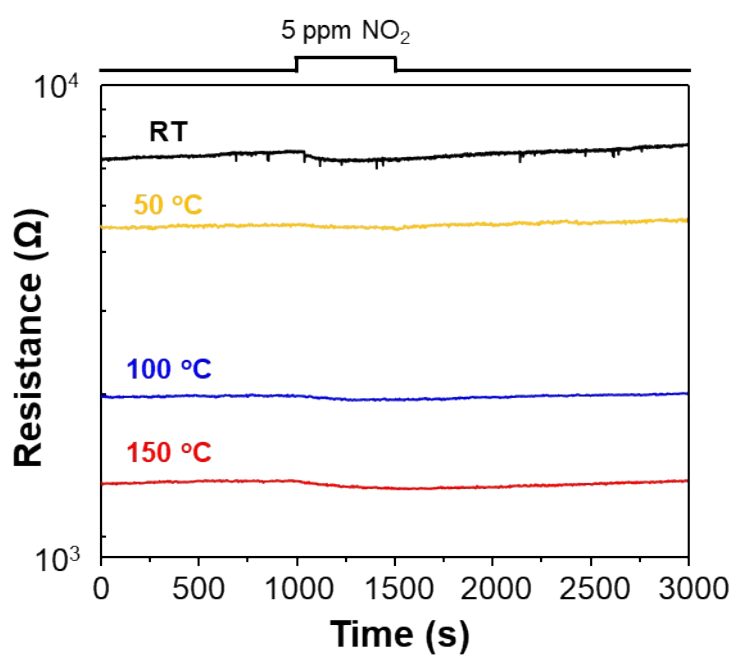

**Fig. S4.** Resistance curves for 5 ppm NO<sub>2</sub> as a function of operating temperature for a GQD@SnO<sub>2</sub> nanodomes under humid condition (relative humidity: 50 %).

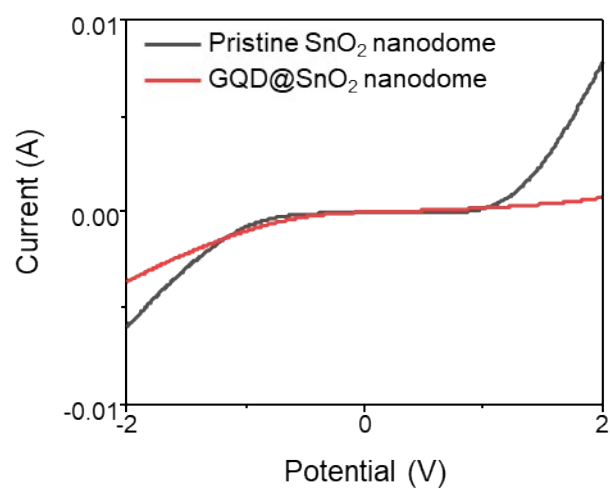

**Fig. S5.**  $I$ - $V$  curve of  $\text{SnO}_2$  nanodomains and  $\text{GQD@SnO}_2$  nanodomains

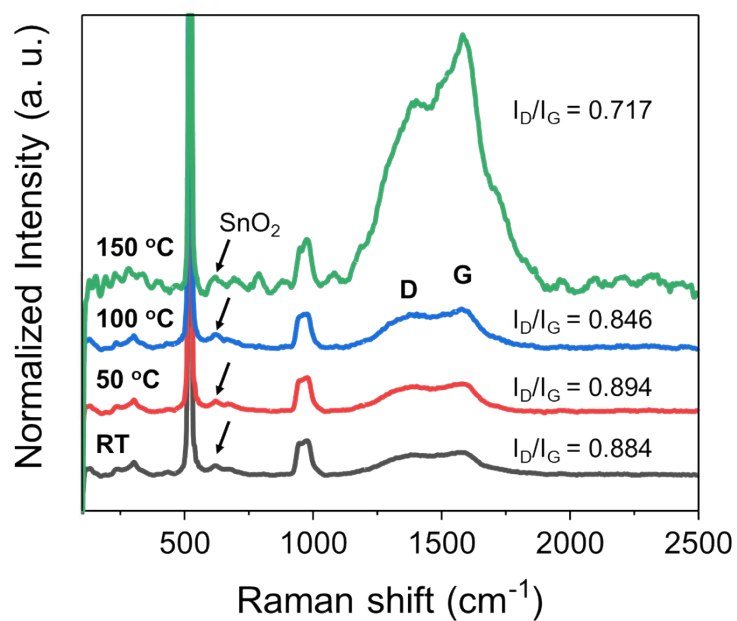

**Fig. S6.** Raman spectrum of the  $\text{GQDs@SnO}_2$  nanodomains.

**Table S1.** Comparison of gas sensing performance of GQDs/graphene-based gas sensors.

| Year | Material                                                     | Temp. (°C) | $t_{res}^g/t_{rec}^h$ (s) | Response                             | LOD <sup>i</sup> (ppb) | Refs.            |
|------|--------------------------------------------------------------|------------|---------------------------|--------------------------------------|------------------------|------------------|
|      |                                                              |            |                           | $((R_a-R_g)/R_g)$ or $(R_g-R_a)/R_a$ |                        |                  |
| 2022 | GQD@SnO <sub>2</sub> nanodomains                             | 150        | 322/105                   | 39.1<br>(5 ppm)                      | 1.1                    | <i>This work</i> |
| 2021 | N-GQDs <sup>a</sup> -SnO <sub>2</sub> hollow cube            | 130        | 59/33                     | 417<br>(1 ppm)                       | -                      | 3                |
| 2021 | GQD-metal phthalocyanine hybrid                              | RT         | 100/100                   | 15.8<br>(50 ppm)                     | 50                     | 4                |
| 2020 | N-GD <sup>b</sup> -SnO <sub>2</sub> -0D heterostructure      | 50         | 528/384                   | 4336<br>(100 ppb)                    | 20                     | 5                |
| 2020 | N-GQDs-3D ordered macroporous In <sub>2</sub> O <sub>3</sub> | 100        | 95/36                     | 81.7<br>(1 ppm)                      | 100                    | 6                |
| 2020 | BiVO <sub>4</sub> /Cu <sub>2</sub> O/rGO <sup>c</sup>        | 60         | 51.3/87.5                 | 8.1<br>(1 ppm)                       | -                      | 7                |
| 2020 | CuWO <sub>4</sub> /rGO                                       | RT         | 38/22                     | 9.45<br>(50 ppm)                     | 500                    | 8                |
| 2019 | rGO/ZnO-CT <sup>d</sup>                                      | RT         | 140/630                   | 1.15<br>(15 ppm)                     | 43.5                   | 9                |
| 2018 | rGO-Co <sub>3</sub> O <sub>4</sub>                           | RT         | 90/2400                   | 1.27<br>(5 ppm)                      | 50                     | 10               |
| 2018 | CuO/rGO                                                      | RT         | 66/34                     | 14<br>(1 ppm)                        | 60                     | 11               |
| 2018 | WO <sub>3</sub> /S-rGO <sup>e</sup>                          | RT         | 6/56                      | 2.50<br>(20 ppm)                     | -                      | 12               |
| 2017 | SnO <sub>2</sub> /N-RGO <sup>f</sup>                         | RT         | 45/168                    | 1.38<br>(5 ppm)                      | -                      | 13               |
| 2017 | rGO-In <sub>2</sub> O <sub>3</sub>                           | RT         | 208/39                    | 109<br>(1 ppm)                       | 10                     | 14               |
| 2016 | ZnO/rGO                                                      | RT         | 75/132                    | 2.19<br>(1 ppm)                      | 50                     | 15               |

<sup>a</sup>) nitrogen-doped graphene quantum dots; <sup>b</sup>) nitrogen-doped graphene dot; <sup>c</sup>) reduced graphene oxide; <sup>d</sup>) cotton thread; <sup>e</sup>) sulfonated reduced graphene oxide; <sup>f</sup>) nitrogen-doped reduced graphene oxide; <sup>g</sup>) response time; <sup>h</sup>) recovery time; <sup>i</sup>) limit of detection

**Table S2.** Response/recovery times of bare SnO<sub>2</sub> and GQD@SnO<sub>2</sub> nanodome gas sensors at different operating temperatures.

|               | <b>Bare SnO<sub>2</sub> nanodome</b> |                   | <b>GQD@SnO<sub>2</sub> nanodome</b> |                   |
|---------------|--------------------------------------|-------------------|-------------------------------------|-------------------|
|               | Response time (s)                    | Recovery time (s) | Response time (s)                   | Recovery time (s) |
| <b>RT</b>     | -                                    | -                 | 452                                 | > 1500            |
| <b>50 °C</b>  | -                                    | -                 | 450                                 | > 1500            |
| <b>100 °C</b> | 315                                  | > 1500            | 459                                 | 1322              |
| <b>150 °C</b> | 59                                   | 1247              | 322                                 | 105               |



## References

1. C. Zhang, S. Cvetanovic and J. M. Pearce, *MethodsX*, 2017, **4**, 229-242.
2. S. H. Song, M. H. Jang, J. Chung, S. H. Jin, B. H. Kim, S. H. Hur, S. Yoo, Y. H. Cho and S. Jeon, *Adv. Opt. Mater.*, 2014, **2**, 1016-1023.
3. Y. K. Lv, Y. Y. Li, H. C. Yao and Z. J. Li, *Sens. Actuators B Chem.*, 2021, **339**, 129882.
4. W. Jiang, X. Chen, T. Wang, B. Li, M. Zeng, J. Yang, N. Hu, Y. Su, Z. Zhou and Z. Yang, *RSC Adv.*, 2021, **11**, 5618-5628.
5. R. Purbia, Y. M. Kwon, H.-D. Kim, Y. S. Lee, H. Shin and J. M. Baik, *J. Mater. Chem. A*, 2020, **8**, 11734-11742.
6. Y.-K. Lv, Y.-Y. Li, R.-H. Zhou, Y.-P. Pan, H.-C. Yao and Z.-J. Li, *ACS Appl. Mater. Interfaces*, 2020, **12**, 34245-34253.
7. Q. Li, N. Han, K. Zhang, S. Bai, J. Guo, R. Luo, D. Li and A. Chen, *Sens. Actuators B Chem.*, 2020, **320**, 128284.
8. W. Zhang, D. Zhang and Y. Zhang, *J. Mater. Sci. Mater.*, 2020, **31**, 6706-6715.
9. W. Li, R. Chen, W. Qi, L. Cai, Y. Sun, M. Sun, C. Li, X. Yang, L. Xiang, D. Xie and T. Ren, *ACS Sensors*, 2019, **4**, 2809-2818.
10. B. Zhang, M. Cheng, G. Liu, Y. Gao, L. Zhao, S. Li, Y. Wang, F. Liu, X. Liang, T. Zhang and G. Lu, *Sens. Actuators B Chem.*, 2018, **263**, 387-399.
11. Z. Li, Y. Liu, D. Guo, J. Guo and Y. Su, *Sens. Actuators B Chem.*, 2018, **271**, 306-310.
12. T. Wang, J. Hao, S. Zheng, Q. Sun, D. Zhang and Y. Wang, *Nano Res.*, 2018, **11**, 791-803.
13. Z. Wang, C. Zhao, T. Han, Y. Zhang, S. Liu, T. Fei, G. Lu and T. Zhang, *Sens. Actuators B Chem.*, 2017, **242**, 269-279.
14. J. Liu, S. Li, B. Zhang, Y. Wang, Y. Gao, X. Liang, Y. Wang and G. Lu, *J. Colloid Interface Sci.*, 2017, **504**, 206-213.
15. Y. Xia, J. Wang, J.-L. Xu, X. Li, D. Xie, L. Xiang and S. Komarneni, *ACS Appl. Mater. Interfaces*, 2016, **8**, 35454-35463.
